# Supplementary material for: Optimizing Nitrogen Application for Chinese Ratoon Rice Based on Yield and Reactive Nitrogen Loss
Source: MDPI journal article supplement (doi:10.3390/agriculture12071064), 2022-07-20
Supplement: s1 [file s1]

## Supplementary materials

### Optimizing the nitrogen application for Chinese ratoon rice based on yield and reactive nitrogen loss

Table S1 Information of zone, province and experiment sites.

| Zone | Province      | Experiment sites (number)                                                                                                                                                                                                                                                                                                                                                                                                                                        |
|------|---------------|------------------------------------------------------------------------------------------------------------------------------------------------------------------------------------------------------------------------------------------------------------------------------------------------------------------------------------------------------------------------------------------------------------------------------------------------------------------|
| SC   | Guangdong (2) | Boluo County Mabei town (1); Xingning County Xinxu town (1).                                                                                                                                                                                                                                                                                                                                                                                                     |
|      | Guangxi (3)   | Luocheng County Xiaochangan town (1); Rongshui County Xiang fentown (1); Tianyang County Baiyu town (1).                                                                                                                                                                                                                                                                                                                                                         |
|      | Hainan (2)    | Chengmai County (1); Yizhou County (1).                                                                                                                                                                                                                                                                                                                                                                                                                          |
|      | Taiwan        | -                                                                                                                                                                                                                                                                                                                                                                                                                                                                |
| SEC  | Fujian (20)   | Youxi County Sanming City (5); Mingqing County Shenghuang town (2); Fuan County Shangbaishi town (1); Pucheng County Nanping City (1); Sha County Xiamao town (1); Sanming City (1); Yanping County Nanping City (1); Longyan City (1); Shaowu City (1); Changting County (1); Xianyou County (1).                                                                                                                                                               |
|      | Jiangxi (4)   | Ganzhou City (1); Jinxian County Nanchang City (2); Nanchang City (1).                                                                                                                                                                                                                                                                                                                                                                                           |
|      | Zhejiang      | -                                                                                                                                                                                                                                                                                                                                                                                                                                                                |
| CC   | Hubei (24)    | Shakou town Honghu City (2); Tuanfeng County Huanggang City (2); Qichun County Huanggang City (9); Yunmeng County Wuluo town (1); Jingshan County Songhe town (1); Jingshan County yanmenkou town (1); Huaqiao town Wuxue City (2); Wuxue County Dajing town (1); Linpu town Jingmen City (1); Qianjiang City (1); Meichuan town Wuxue City (1); Jian County Maoshi town (1); Qichun County Chidong town, Baota town Xianning City, Shakou town Honghu City (1). |
|      | Hunan (8)     | Chenxi County AnPing town (1); Shuang County Shangrenli town (1); Chang sha City (3); Datonghu County Yiyang City (1); Yongzhou City (1); Nan County, Heshan County, Linxiang County; Yuanjiang City, Xupu County, Cili County, Qidong County (1).                                                                                                                                                                                                               |
| NEC  | Anhui (3)     | Huaining County Anqing City (3).                                                                                                                                                                                                                                                                                                                                                                                                                                 |
|      | Henan (1)     | Shangcheng County Hefengqiao town. (1)                                                                                                                                                                                                                                                                                                                                                                                                                           |
|      | Jiangsu       | -                                                                                                                                                                                                                                                                                                                                                                                                                                                                |
| SC   | Sichuan (7)   | Liangping County Tianzhu town (1); Lu County Fuji town (1); Yanjiang County Ziyang City (1); Fushun County Daisi town (1); Fushun County Qilong town (1); Sichuan City (1); Longmatan County Luzhou City (1).                                                                                                                                                                                                                                                    |
|      | Yunnan        | -                                                                                                                                                                                                                                                                                                                                                                                                                                                                |
|      | Guizhou       | -                                                                                                                                                                                                                                                                                                                                                                                                                                                                |
|      | Chongqing (2) | Kai County Yuexi town (1); Tongliang County Chongqing City (1).                                                                                                                                                                                                                                                                                                                                                                                                  |

Notes: Henan was divided into NEC and Chongqing was divided into SW, SC=South China, SEC=Southern part of East China, CC=Central China, NEC=Northern part of East China, SC=Southwest; “-” show no experiment sites was found.

Table S2 Protein and nitrogen content of grain for ratoon rice in five areas of China.

|          | Protein (%) |             | Nitrogen content of grain (%) |             |             | Grain N uptake<br>(kg ha <sup>-1</sup> ) |
|----------|-------------|-------------|-------------------------------|-------------|-------------|------------------------------------------|
|          | Main crop   | Ratoon crop | Main crop                     | Ratoon crop | Average     | Average                                  |
| SC       | -           | -           | 1.85                          | 1.39        | 1.62 ± 0.15 | 189                                      |
| SEC (14) | -           | 8.66        | 1.85                          | 1.39        | 1.62 ± 0.15 | 230                                      |
| CC (119) | 11.57       | 8.71        | 1.85                          | 1.39        | 1.62 ± 1.03 | 225                                      |
| NEC (6)  | -           | 6.13        | 1.21                          | 0.98        | 1.10 ± 0.05 | 138                                      |
| SW (21)  | 7.59        | 7.50        | 1.21                          | 1.20        | 1.21 ± 0.17 | 132                                      |
| China    | 9.58        | 7.75        | 1.60                          | 1.28        | 1.62        | 202                                      |

Notes: Nitrogen content of grain = Protein/6.25; grain N uptake (kg ha<sup>-1</sup>) = Nitrogen content of grain \* the sum yield of main crop and ratoon crop; “1.62” was used as the average of China due to the lack of NEC and SW data “-” show no data was found, and we use the data closet to the test site.

Table S3 Nutrient source (atmospheric deposition, biological fixation of nitrogen and rice seedling) into cropland.

| Items                           | Zone  | Mean (kg ha <sup>-1</sup> ) | Range     | CV   | Source  |
|---------------------------------|-------|-----------------------------|-----------|------|---------|
| N Deposition                    | SC    | 40.95                       | 32.3~49.6 | 0.21 | [13,62] |
|                                 | SEC   | 43.17                       | 33.8~51.5 | 0.17 | [13,62] |
|                                 | CC    | 46.68                       | 34.9~68.9 | 0.25 | [13,62] |
|                                 | NEC   | 47.00                       | 37.1~56.9 | 0.21 | [13,62] |
|                                 | SW    | 37.78                       | 24.3~63.0 | 0.35 | [13,62] |
| Biological fixation of Nitrogen | China | 25                          | -         | -    | [63]    |
| Rice seedling                   | China | 2.9                         | -         | -    | [64]    |

Table S4 Models for calculating reactive nitrogen (Nr) loss

| Zone | NH <sub>3</sub> (kg ha <sup>-1</sup> ) | Leaching (kg ha <sup>-1</sup> )         | Runoff (kg ha <sup>-1</sup> )           |
|------|----------------------------------------|-----------------------------------------|-----------------------------------------|
| SC   | $Y=4.95+0.17x$ ( $R^2=0.59^{**}$ )     | $Y=2.25e^{0.0033x}$ ( $R^2=0.20^{**}$ ) | $Y=2.62e^{0.0033x}$ ( $R^2=0.83^{**}$ ) |
| SEC  | $Y=-0.54+0.20x$ ( $R^2=0.40^{**}$ )    | $Y=2.25e^{0.0033x}$ ( $R^2=0.20^{**}$ ) | $Y=3.05e^{0.0040x}$ ( $R^2=0.17^{**}$ ) |
| CC   | $Y=-0.54+0.20x$ ( $R^2=0.40^{**}$ )    | $Y=2.25e^{0.0033x}$ ( $R^2=0.20^{**}$ ) | $Y=3.05e^{0.0040x}$ ( $R^2=0.17^{**}$ ) |
| NEC  | $Y=-0.54+0.20x$ ( $R^2=0.40^{**}$ )    | $Y=2.25e^{0.0033x}$ ( $R^2=0.20^{**}$ ) | $Y=3.05e^{0.0040x}$ ( $R^2=0.17^{**}$ ) |
| SW   | $Y=4.95+0.17x$ ( $R^2=0.59^{**}$ )     | $Y=2.25e^{0.0033x}$ ( $R^2=0.20^{**}$ ) | $Y=2.62e^{0.0033x}$ ( $R^2=0.83^{**}$ ) |

Notes: Y and x denote N loss (kg N ha<sup>-1</sup>) and fertilizer N rate (kg N ha<sup>-1</sup>), respectively.  $^{**}p<0.01$  and  $^{*}p<0.05$  indicate significance of the regression model, and the calculation is from Cui et al [65].

Table S5 Relationship between N application and yield for RR in five areas of China.

| Site | Yield response               | N rate for highest point<br>(kg ha <sup>-1</sup> ) | n   | p        |
|------|------------------------------|----------------------------------------------------|-----|----------|
| SC   | $Y=-8E-05x^2+0.0462x+4.5561$ | 288.75                                             | 47  | $p<0.05$ |
| SEC  | $Y=-5E-05x^2+0.0252x+9.9022$ | 252.00                                             | 109 | $p<0.05$ |
| CC   | $Y=-4E-05x^2+0.0244x+9.9475$ | 305.00                                             | 371 | $p<0.05$ |
| NEC  | $Y=-0.0011x^2+0.8698-158.71$ | 395.36                                             | 23  | -        |
| SW   | $Y=-4E-05x^2+0.0198x+8.3064$ | 278.75                                             | 137 | $p<0.05$ |

Notes: “n” indicates the total data.

Table S6 Relationship between N application and NUE for RR in five areas of China.

| Site | NUE response                  | N rate for highest point<br>(kg ha <sup>-1</sup> ) | n   | p        |
|------|-------------------------------|----------------------------------------------------|-----|----------|
| SC   | $Y=-0.0009x^2+0.285x+39.201$  | 158.33                                             | 30  | $p<0.01$ |
| SEC  | $Y=-0.0003x^2+0.1171x+53.104$ | 195.17                                             | 127 | $p<0.01$ |
| CC   | $Y=-0.0004x^2+0.1273x+62.917$ | 159.13                                             | 328 | $p<0.01$ |
| NEC  | $Y=-0.0129x^2+10.058x-1921.8$ | 389.84                                             | 23  | -        |
| SW   | $Y=-0.0004x^2+0.1332x+36.021$ | 166.50                                             | 148 | $p<0.01$ |

Notes: “n” indicates the total data.

Table S7 Relationship between N application and grain N uptake for RR in five areas of China.

| Site | N uptake by grain response          | N rate for highest point<br>(kg ha <sup>-1</sup> ) | n   | <i>p</i>   |
|------|-------------------------------------|----------------------------------------------------|-----|------------|
| SC   | $Y = -0.0007x^2 + 0.3922x + 135.07$ | 297.79                                             | 47  | $p < 0.01$ |
| SEC  | $Y = -0.0005x^2 + 0.2839x + 183.53$ | 283.90                                             | 146 | -          |
| CC   | $Y = -0.0007x^2 + 0.3983x + 170.53$ | 284.50                                             | 382 | $p < 0.05$ |
| NEC  | $Y = -0.0709x^2 + 55.756x - 10733$  | 393.20                                             | 22  | -          |
| SW   | $Y = -0.0005x^2 + 0.2807x + 94.372$ | 280.07                                             | 143 | $p < 0.01$ |

Notes: “n” indicates the total data.

Table S8 The accumulated temperature and planting density in different province.

|         | Accumulated<br>temperature (°C) | Heat index (°C)                                               | Planting<br>density (×10 <sup>4</sup><br>Hills ha <sup>-1</sup> ) | Source  |
|---------|---------------------------------|---------------------------------------------------------------|-------------------------------------------------------------------|---------|
| Guangxi | >6500                           | ≥10                                                           | 20.29c                                                            | [42]    |
| Fujian  | >4800                           | Total accumulated temperature<br>of main crop and ratoon crop | 27.15a                                                            | [66]    |
| Hubei   | 4900-5400                       | ≥10                                                           | 25.33b                                                            | [66-67] |
| Anhui   | 4600-5300                       | ≥10                                                           | -                                                                 | [43]    |
| Sichuan | 5100-5700                       | ≥10                                                           | 21.65c                                                            | [21]    |

Note: Planting density is from the raw data of 782 studies, “-” show no data was found.
